## ERRATUM

### **Nebulization of Antiinfective Agents in Invasively Mechanically Ventilated Adults: A Systematic Review and Meta-analysis: Erratum**

In the article beginning on page 890 in the May 2017 issue, the first sentence of the Competing Interests section is incorrect due to a publisher error. The correct sentence is “Dr. Rello received research grants and consulting fees from Bayer (Leverkusen, Germany) and Genentech (San Francisco, California).” This error has been corrected in the online version of the article.

### **Reference**

Solé-Lleonart C, Rouby J-J, Blot S, Poulakou G, Chastre J, Palmer L, Bassetti M, Luyt C, Pereira J, Riera J, Felton T, Dhanani J, Welte T, Garcia-Alamino J, Roberts J, Rello J: Nebulization of antiinfective agents in invasively mechanically ventilated adults: A systematic review and meta-analysis. *ANESTHESIOLOGY* 2017; 126:890–908
